# Supplementary material for: Neutralization of the emerging SARS-CoV-2 variant Lambda by antibodies elicited by inactivated virus and mRNA vaccines
Source: Research Square preprint supplement (doi:10.21203/rs.3.rs-782704/v1), 2021-08-13
Supplement: Supplementary file 1 [file 1b37952ae2cee166dfe9fa79.docx]

**ONLINE METHODS**

**Study cohort**

Health care workers from two sites in Santiago, Chile, were invited to participate. Volunteers received the two-doses scheme of CoronaVac or BNT162b2, each dose being administered 28 or 21 days apart, respectively, according to the Chilean vaccination program. Plasma samples were collected between May and June 2021. All participants signed an informed consent before any study procedure was undertaken.

**Infectivity assay:**

Pseudotyped viruses carrying different SARS-CoV-2 spike proteins were prepared as we previously described12. Briefly, HIV-1-based SARS-CoV-2 pseudotypes were produced in HEK293T cells by transfecting the pNL4.3-ΔEnv-Luc together with the corresponding pCDNA-SARS-CoV-2 Spike coding vector in a 1:1 molar ratio. Plasmids coding a codon-optimized spike lacking the last 19 amino acids of the C-terminal end (SΔ19) known to avoid retention at the endoplasmic reticulum12 were obtained by gene synthesis or customized site-directed mutagenesis (GeneScript) and contained the following mutations: lineage A (reference sequence), lineage B (D614G), lineage B.1.1.7 (Δ69-70, Δ144, N501Y, A570D, D614G, P681H, T716I, S982A, D1118H), lineage P.1 (L18F, T20N, P26S, D138Y, R190S, K417T, E484K, N501Y, D614G, H655Y, T1027I) and lineage C.37 (G75V, T76I, Δ246-252, L452Q, F490S, D614G, T859N). Each pseudotype preparation was cleared by centrifugation at 3,000 rpm at room temperature, quantified using the HIV-1 Gag p24 Quantikine ELISA Kit (R&D Systems), aliquoted in 50% fetal bovine serum (Sigma-Aldrich), and stored at -80 ºC until use.

Different amounts of pseudotyped viruses (as determined by the levels of the HIV-1 p24 protein) were used to infect HEK-ACE2 cells, and 48 hours later, firefly luciferase activity was measured using the Luciferase Assay Reagent (Promega) in a Glomax 96 Microplate luminometer (Promega).

**Neutralization assay**

Pseudotyped virus neutralization assays were performed essentially as we previously described12. Briefly, serial dilutions of the plasma samples (1:4 to 1:8748 for CoronaVac and 1:10 to 1:21870 for BNT162b2) were prepared in DMEM with 10% fetal bovine serum and incubated with 5 ng of p24 of each pseudotyped virus during 1h at 37 °C and then, 1x104 of HEK-ACE2 cells were added to each well. HEK293T cells (not expressing ACE2) incubated with the pseudotyped virus (lineage A) were used as a negative control. Cells were lysed 48 hours later, and firefly luciferase activity was measured using the Luciferase Assay Reagent (Promega) in a Glomax 96 Microplate luminometer (Promega). The percentage of neutralization for each dilution was calculated, and the ID50 of each sample was calculated using GraphPad Prism version 9.0.1.

**Structural and sequence analyses**

Mutations and antigenic sites were mapped on previously determined crystal structures (PDB: 7BNN, PDB: 7BWJ, PDB: 7LY0). Structural alignments were performed using Swiss-PdbViewer, displayed by PyMOL v.2.4.1 (http://www.pymol.org/pymol), and rendered by Blender v.2.92.0 (http://www.blender.org). The reference sequence of spike protein included in the analysis was YP_009724390.1 (SARS-CoV-2). Multiple sequence alignment was performed with ClustalO v1.2.4 and visualized with MEGA X v10.2.6 (PMID: 29722887). NCBI sequences of spike proteins from betacoronaviruses included in the analysis were as follows: SARS-CoV-2 (YP_009724390.1), RatG13 (bat) (QHR63300.2), PCoV (pangolin) (QIQ54048.1), SARS-CoV (YP_009825051.1), WIV16 (bat) (ALK02457.1), BtRl (bat) (QDF43815.1), Khosta-2 (bat) (QVN46569.1), MERS-CoV (YP_007188579.1), HKU5 (bat) (YP_001039962.1), MCoV (mouse) (AGT17716.1), HKU23 (camel) (QEY10673.1), BCoV (bovine) (AMQ23500.1), OC43 (YP_009555241.1), HKU24 (rat) (YP_009113025.1), and HKU1 (AXT92528.1).

**Statistical analyses:** Statistical analyses were performed using GraphPad Prism software version 9.1.2. (La Jolla, California, USA). Multiple group comparisons for serum neutralization titers against a panel of SARS-CoV-2 pseudoviruses were applied using Kruskal-Wallis test with false discovery rate (FDR) method, and multiple testing correction was performed for each comparison using Benjamini-Hochberg (BH) procedure at a 5% FDR threshold. Factor change was calculated as the difference of geometric mean titer in the ID50 as compared with that of the Wild type pseudotyped virus. Comparisons of NAbs responses by sex and smoke status were carried out using a paired Wilcoxon signed-ranked test. Correlation analysis between NAbTs and age or BMI was carried out using Spearman’s test. One-way ANOVA and Tukey’s multiple comparison test were performed for statistical analysis of infectivity. A p-value ≤0.05 was considered as statistically significant.

**Ethical approval:**

The study protocol was approved by the Ethics Committee of the Faculty of Medicine at Universidad de Chile (Projects Nº 0361-2021 and Nº 096-2020) and Clínica Santa Maria (Project Nº132604-21). All donors signed an informed consent, and their samples were anonymized.

**Supplementary Table 1. Characteristics of study subjects.**

| **Characteristics** | **Total** | **CoronaVac** | **BNT162b2** |
| --- | --- | --- | --- |
| **No. of participants** | 133 | 75 | 58 |
| **Age (median, IQR)** | 34 (29-44) | 34 (29-43) | 34.5 (29-44) |
| **Sex** |  |  |  |
| Male (%) | 38 (29) | 20 (27) | 18 (31) |
| Female (%) | 95 (71) | 55 (73) | 40 (69) |
| **BMI (median, IQR)** | 25 (23-28) | 25 (22-27) | 25 (23-29) |
| **Active Smokers (%)** | 32 (24) | 15 (20) | 17 (29) |
| **Sample collection (days from 2nd dose, median, IQR)** | 96 (107-94) | 95 (96-76) | 108 (110-104) |

**Supplementary Table 2. Descriptive Statistics ID50 CoronaVac**

|  | **Wild Type** | **D614G** | **Alpha (B.1.1.7)** | **Gamma (P.1)** | **Lambda (C.37)** |
| --- | --- | --- | --- | --- | --- |
| **Mean** | 191,5 | 153,9 | 124,7 | 104,6 | 78,76 |
| **Std. Deviation** | 158,6 | 166,2 | 167,5 | 128,4 | 125,7 |
| **Std. Error of Mean** | 18,32 | 19,19 | 19,34 | 14,83 | 14,52 |
|  |  |  |  |  |  |
| **Lower 95% CI** | 155,0 | 115,7 | 86,20 | 75,02 | 49,83 |
| **Upper 95% CI** | 228,0 | 192,2 | 163,3 | 134,1 | 107,7 |
|  |  |  |  |  |  |
| **Geometric mean** | 138,7 | 101,2 | 68,10 | 59,23 | 45,48 |
| **Geometric SD factor** | 2,286 | 2,456 | 3,020 | 2,992 | 2,727 |
|  |  |  |  |  |  |
| **Lower 95% CI of geo. mean** | 114,7 | 82,30 | 52,81 | 46,03 | 36,11 |
| **Upper 95% CI of geo. mean** | 167,7 | 124,4 | 87,82 | 76,21 | 57,29 |
|  |  |  |  |  |  |
| **25% Percentile** | 73,62 | 52,37 | 36,15 | 26,66 | 22,36 |
| **Median** | 143,9 | 95,68 | 64,11 | 53,22 | 46,66 |
| **75% Percentile** | 265,1 | 181,4 | 132,6 | 140,5 | 90,32 |

**Descriptive Statistics of differences in the neutralization titers relative to Wild type**

|  | **Wild Type/ D614G** | **Wild Type/ Alpha (B.1.1.7)** | **Wild Type/ Gamma (P.1)** | **Wild Type/ Lambda (C.37)** |
| --- | --- | --- | --- | --- |
| **Mean** | 37,53 | 66,73 | 86,90 | 112,7 |
| **Std. Deviation** | 124,0 | 130,7 | 128,5 | 136,8 |
| **Std. Error of Mean** | 14,32 | 15,10 | 14,83 | 15,80 |
|  |  |  |  |  |
| **Lower 95% CI** | 66,07 | 96,81 | 116,5 | 144,2 |
| **Upper 95% CI** | 9,000 | 36,65 | 57,34 | 81,23 |
|  |  |  |  |  |
| **Geometric mean** | 1.37 | 2.035 | 2.34 | 3.05 |

**Supplementary Table 3. Descriptive Statistics ID50 BNT162b2**

|  | **Wild Type** | **D614G** | **Alpha (B.1.1.7)** | **Gamma (P.1)** | **Lambda (C.37)** |
| --- | --- | --- | --- | --- | --- |
| **Mean** | 1212 | 1014 | 737,0 | 730,5 | 640,6 |
| **Std. Deviation** | 1890 | 1191 | 1063 | 1664 | 955,2 |
| **Std. Error of Mean** | 248,2 | 156,4 | 139,6 | 218,5 | 125,4 |
|  |  |  |  |  |  |
| **Lower 95% CI** | 715,2 | 700,3 | 457,5 | 293,0 | 389,4 |
| **Upper 95% CI** | 1709 | 1327 | 1016 | 1168 | 891,7 |
|  |  |  |  |  |  |
| **Geometric mean** | 803,8 | 728,2 | 488,4 | 427,8 | 427,7 |
| **Geometric SD factor** | 2,205 | 2,156 | 2,355 | 2,373 | 2,301 |
|  |  |  |  |  |  |
| **Lower 95% CI of geo. mean** | 652,9 | 595,0 | 389,9 | 340,8 | 343,6 |
| **Upper 95% CI of geo. mean** | 989,6 | 891,2 | 611,7 | 536,9 | 532,5 |
|  |  |  |  |  |  |
| **25% Percentile** | 495,6 | 453,2 | 320,8 | 273,6 | 256,5 |
| **Median** | 764,8 | 724,5 | 448,0 | 402,9 | 430,3 |
| **75% Percentile** | 1082 | 1120 | 783,6 | 737,8 | 694,2 |

**Descriptive Statistics of Differences in the neutralization titers relative to Wild type**

|  | **Wild Type/ D614G** | **Wild Type/ Alpha (B.1.1.7)** | **Wild Type/ Gamma (P.1)** | **Wild Type/ Lambda (C.37)** |
| --- | --- | --- | --- | --- |
| **Mean** | 198,6 | 475,2 | 481,7 | 571,6 |
| **Std. Deviation** | 841,0 | 944,9 | 650,9 | 1027 |
| **Std. Error of Mean** | 110,4 | 124,1 | 85,47 | 134,8 |
|  |  |  |  |  |
| **Upper 95% CI** | 419,7 | 723,6 | 652,8 | 841,6 |
| **Lower 95% CI** | 22,54 | 226,7 | 310,5 | 301,6 |
|  |  |  |  |  |
| **Geometric mean** | 1.10 | 1.65 | 1.88 | 1.87 |
