# Supplementary material for: Neutralization of the emerging SARS-CoV-2 variant Lambda by antibodies elicited by inactivated virus and mRNA vaccines
Source: Research Square preprint supplement (doi:10.21203/rs.3.rs-782704/v1), 2021-08-13
Supplement: Supplementary file 2 [file d39fd28241cce00e7c0c218f.docx]

**Neutralización de la variante emergente de SARS-CoV-2 Lambda por anticuerpos generados por vacunas de virus inactivado y de ARN mensajero**

Mónica L. Acevedo1, Luis Alonso-Palomares1, Marco Montes de Oca2, Andrés Bustamante1, Aldo Gaggero3, Fabio Paredes4, Claudia P. Cortés5,6, Sergio Pantano7, Marcelo A. Navarrete2, Fernando Valiente-Echeverría1* Ricardo Soto-Rifo1*

1Laboratorio de Virología Molecular y Celular, Programa de Virología, Instituto de Ciencias Biomédicas, Facultad de Medicina, Universidad de Chile, Santiago 8389100, Chile.

2Escuela de Medicina, Universidad de Magallanes, Punta Arenas 6210427, Chile

3Laboratorio de Virología Ambiental, Programa de Virología, Instituto de Ciencias Biomédicas, Facultad de Medicina, Universidad de Chile, Santiago 8389100, Chile.

4Departamento de Epidemiología, Ministerio de Salud de Chile, Chile

5Clínica Santa María, Santiago, Chile.

6Departamento de Medicina Centro, Facultad de Medicina, Universidad de Chile, Santiago, Chile.

7Biomolecular Simulations Group, Instituto Pasteur de Montevideo, Montevideo 11400, Uruguay

*Correspondencia:

Ricardo Soto-Rifo / Fernando Valiente-Echeverría

Laboratorio de Virología Molecular y Celular, Programa de Virología, Instituto de Ciencias Biomédicas, Facultad de Medicina, Universidad de Chile, Santiago, RM, Chile, 838910

Phone: +56229789616

Email: [rsotorifo@uchile.cl](mailto:rsotorifo@uchile.cl) / [fvaliente@uchile.cl](mailto:fvaliente@uchile.cl)

**RESUMEN**

En este trabajo, usamos virus pseudotipados para caracterizar la capacidad neutralizante de los anticuerpos generados por las vacunas CoronaVac y BTN162b2 contra la variante de interés emergente Lambda. Observamos que BTN162b2 genera títulos de anticuerpos neutralizantes más altos que los generados por CoronaVac que van desde 5.8 veces para la proteína espiga del virus ancestral a 9.4 veces para la espiga de la variante Lambda. La neutralización de las variantes D614G, Alpha, Gamma y Lambda se redujo entre 1.78 y 3.05 veces para CoronaVac y 1.10 a 1.87 veces para BTN162b2. Análisis de la estructura de la proteína espiga de Lambda muestran cambios significativos en sitios antigénicos incluyendo la deleción 246-252 en un sitio super antigénico del NTD y L452Q/F490S en el RBD, los cuales deben contribuir al escape inmunológico. Nuestros análisis con pseudotipos de virus también sugieren un incremento de la infectividad mediada por la espiga de Lambda. En conjunto, nuestros resultados indican que la vacuna de virus inactivado y la vacuna de ARN mensajero generan niveles diferentes de anticuerpos neutralizantes con una potencia diferente para neutralizar variantes de SARS-CoV-2 incluyendo la variante emergente Lambda.

**TEXTO**

La emergencia de variantes de preocupación (VOC) e interés (VOI) de SARS-CoV-2 ha marcado la pandemia de COVID-19 durante el 20211. La clasificación de VOC y VOI por la OMS es dinámica con variantes emergentes como Lambda recientemente reconocidas (linaje C.37) mientras que otras como Épsilon (linaje B.1.427/29), Zeta (linaje P.2) y Theta (linaje P.3) ya no son consideradas como tal2.

Las variantes de preocupación e interés se caracterizan por la presencia de mutaciones ubicadas en posiciones clave de la proteína espiga incluyendo aquellas en el dominio de unión al receptor tal cómo N501Y (compartidas por las VOC Alpha, Beta y Gamma) asociada con un incremento en la unión al receptor ACE2 y la infectividad o K417N/T y E484K (compartidas por las VOC Beta y Gamma) asociadas con escape a los anticuerpos neutralizantes1. La proteína espiga de la variante de interés emergente Lambda posee un patrón único de siete mutaciones (G75V, T76I, Δ246-252, L452Q, F490S, D614G, T859N) que no ha sido descritas previamente en otra VOC o VOI3.

La presencia de mutaciones en sitios antigénicos que caracteriza a las variantes de preocupación e interés ha aumentado la preocupación con respecto al impacto sobre la capacidad neutralizante de los anticuerpos generados por las vacunas que actualmente están disponibles, las cuales fueron desarrolladas usando la proteína espiga del linaje ancestral como referencia. De hecho, diversos estudios han mostrado que las variantes pueden escapan a la neutralización de los anticuerpos generados por vacunas, aunque a diferentes niveles1. De manera interesante estudios recientes sugieren que los títulos de anticuerpos neutralizantes generados por las vacunas podrían ser considerados como un correlato de protección4,5. Bajo este escenario, tanto la emergencia de nuevas variantes de SARS-CoV-2 que poseen mutaciones en sitios antigénicos dentro de la proteína espiga como su impacto en la capacidad neutralizante de los anticuerpos generados por las vacunas requiere de un monitoreo continuo.

La vacuna de virus inactivado CoronaVac y la vacuna de ARN mensajero BNT162b2 fueron identificadas entre aquellas con menores y mayores correlatos de protección, respectivamente4,5. Por lo tanto, quisimos determinar y comparar la capacidad neutralizante de muestras de suero obtenidas de 133 trabajadores de la salud que recibieron el esquema completo de estas vacunas durante la campaña de vacunación del Ministerio de Salud de Chile (Supplementary Table 1). Para esto, generamos virus pseudotipados que contenían la proteína espiga ancestral de SARS-CoV-2 (wild type; linaje A), la proteína espiga con la mutación de D614G (linaje B), así como la proteína espiga de las variantes Alpha (linaje B.1.1.7), Gamma (linaje P.1) and Lambda (linaje C.37), tal como describimos previamente6.

Los ensayos de neutralización usando los pseudotipos de virus que poseían la espiga ancestral revelaron que el promedio geométrico del título ID50 fue 138.7 (95% CI, 114.7 to 167.7) para los individuos que recibieron la vacuna de virus inactivado mientras este fue de 803.8 (95% CI, 652.9 to 989.6) para los individuos que recibieron la vacuna de ARN mensajero (Fig. 1a, izquierda y Supplementary Table 2). Estos datos indican que la vacuna BNT162b2 genera 5.8 veces más títulos de anticuerpos neutralizantes contra la proteína espiga ancestral cuando se compara a CoronaVac (Fig. 1a, izquierda). Los ensayos de neutralización usando pseudotipos virales que poseen la mutación D614G o las variantes Alpha, Gamma y Lambda mostraron un promedio geométrico de los títulos ID50 de 101.2 (95% CI, 82.30 to 124.4), 68.10 (95% CI, 52.81 to 87.82), 59.23 (95% CI, 46.03 to 76.21) y 45.48 (95% CI, 36.11 to 57.29), respectivamente, para las muestras CoronaVac; mientras que estas fueron 728.2 (95% CI, 595.0 to 891.2), 488.4 (95% CI, 389.9 to 611.7), 427.8 (95% CI, 340.8 to 536.9) y 427.7 (95% CI, 343.6 to 532.5) para las muestras de BNT162b2 (Fig. 1a, derecha y Supplementary Tables 2 and 3). Los títulos de anticuerpos neutralizantes contra las variantes de la proteína espiga fueron entre 7.2 y 9.4 veces más altos para las muestras de vacunados con BNT162b2 (Fig. 1a, derecha). Comprado con los datos obtenidos para la espiga ancestral, los títulos de anticuerpos neutralizantes generados por CoronaVac disminuyeron en un factor de 1.37 para la mutante D614G, 2.03 para la espiga de Alpha, 2.33 para la espiga de Gamma y 3.05 para la espiga de Lambda (Fig. 1b, izquierda y 1c, arriba y Supplementary Tables 2 y 3). Los anticuerpos neutralizantes generados por BNT162b2 disminuyeron en un factor de 1.10, 1.65, 1.88 y 1.87 para la mutante D614G o las variantes Alpha, Gamma y Lambda, respectivamente (Fig. 1b, derecha y 1c, abajo y Supplementary Tables 2 and 3).

Los análisis demográficos de nuestra cohorte de estudio indican que no existe una correlación obvia entre el sexo, la edad, el índice de masa corporal o el consumo de cigarrillos y los títulos de anticuerpos neutralizantes, independiente del tipo de vacuna que recibieron (Supplementary Fig. 1a-d).

Los análisis de regiones inmunogénicas en la proteína espiga muestran que las tres variantes de SARS-CoV-2 analizadas presentan mutaciones en epítopos inmunodominantes del motivo de unión al receptor (RBM), los cuales son blancos de anticuerpos de clase I y clase II (Fig. 2a and 2b). Mientras Alpha y Gamma cambian un residuo polar por uno aromático (N501Y) y Gamma cambia la carga de aminoácidos hidrofílicos (E484K, K417T) en el RBM dentro del RBD, la variante Lambda muestra sustituciones de aminoácidos hidrofóbicos por polares (L452Q, F490S) en la misma región (Fig. 2a and 2b). La mutación L452Q es similar a la mutación L452R asociada con un incremento en la infectividad y un escape a los anticuerpos neutralizantes7,8. La mutación F490S también ha sido asociada con escape a los anticuerpos neutralizantes7,9.

Por otro lado, las tres variantes presentan sustituciones en el en el sitio súper antigénico del dominio amino terminal (NTD). Sin embargo, mientras la variante Alpha posee la deleción de un aminoácido (ΔY144) en una horquilla b y Gamma posee dos sustituciones en el extremo terminal (L18F, T20N), la variante Lambda posee una de deleción de siete aminoácidos (Δ246-252) en el *loop* de un sitio súper antigénico 10. De hecho, los análisis de estructuras muestran que tanto L452Q/F490S como Δ246-252 se encuentran en la interface entre la proteína espiga y anticuerpos monoclonales unidos al RBD y el NTD, respectivamente (Supplementary Fig. 2). Este patrón de sustituciones distintivo dentro de sitios antigénicos de la proteína espiga de la variante Lambda puede explicar, al menos en parte, el escape al suero polivalente generado por las vacunas CoronaVac y BNT162b2.

Considerando la emergencia reciente de la variante Lambda como su patrón único de mutaciones en la proteína espiga y su capacidad para escapar de los anticuerpos neutralizantes generados por ambas vacunas, usamos cantidades equivalentes de cada pseudotipo viral y analizamos la capacidad de cada proteína espiga para mediar la entrada a la célula. De manera interesante, observamos que la infectividad del pseudotipo que posee la proteína espiga Lambda fue mayor que aquella de la mutante D614G y las variantes Alpha y Gamma ya sea al emplear cantidades bajas o altas de virus (Supplementary Fig. 3).

Si bien algunas mutaciones en el RBD como N501Y and L452R se han asociado a un incremento en la infectividad1,7,8, mutaciones dentro de dominios intermedios de plegamiento también cambian la infectividad al alterar la dinámica molecular de la espiga11,12. En este sentido, la proteína espiga de la variante Lambda posee la sustitución T859N que se encuentra cercana a G614 en el protómero opuesto (Fig. 2c). En la espiga ancestral, se propuesto que la interacción entre D614 y T859 actúa como un modulador de la estabilidad en la interface inter-protómeros y simulaciones de dinámica molecular sugieren que fluctuaciones en los contactos nativos facilitan la transición entre estados “arriba” y “abajo” del RBD 13. De hecho, la forma G614 incrementa la ocupación del estado “uno-arriba” la que da cuenta de su incremento en la infectividad14.

También nos dimos cuenta qué T859 forma contactos hidrofóbicos con F592 en el protómero opuesto (Fig. 2c). De manera interesante, análisis de conservación entre proteínas espiga de betacoronavirus revelaron que cuando una fenilalanina está presente en una posición equivalente a 592, la posición 859 corresponde a una treonina (Supplementary Fig. 4). La conservación fenilalanina-treonina fue observada exclusivamente en el grupo sarbecovirus, el cual incluye SARS-CoV, PCoV (pangolin), RatG13 (muerciélago) y SARS-CoV-2 (Supplementary Fig. 4). Considerando la relevancia de T859 en la interacción inter-protómeros, el efecto de la mutación T859N característica de la espiga de la variante Lambda requiere mayor investigación.

Los datos presentados aquí confirman que los títulos de anticuerpos neutralizantes generados por la vacuna de ARN mensajero BNT162b2 son mayores a los generados por la vacuna de virus inactivado CoronaVac, en una configuración de vacunación de vida real. Estudios previos han mostrado que la mayoría de los anticuerpos neutralizantes están dirigidos hacia sitios antigénicos presentes en el RBD y, en menor medida, hacia el NTD de la proteína espiga1. En este sentido, la vacuna BNT162b2 se compone de una secuencia de ARN mensajero que codifica la proteína espiga estabilizada en una conformación de pre-fusión que mantiene intactos tanto el RBD como el NTD dentro del dominio S115. Por el contrario, estudios de virus inactivados con b-propiolactona, como aquel usado en la vacuna CoronaVac, mostraron que el 74.4% de la proteína espiga presente en la superficie se encuentra en la conformación post-fusión, por lo tanto, con una fracción mínima (25.6%) de la espiga conservando los mayores sitios antigénicos presentes en el dominio S116. Estas diferencias en la disponibilidad de sitios antigénicos pueden explicar, al menos en parte, las diferencias en los títulos de anticuerpos neutralizantes observados entre ambas plataformas de vacunas.

De manera interesante, un estudio a nivel de nación completa realizado en Israel mostró una efectividad para el esquema completo de la vacuna BNT162b2 de un 97% para prevenir el COVID-19 sintomático, un 97.5% contra la enfermedad severa o grave y un 96.7% contra las muertes relacionadas con el COVID-1917. Un estudio similar para el esquema completo de CoronaVac realizado en Chile mostró una eficacia del 65.9% para prevenir el COVID-19, un 90.3% para prevenir la admisión a la UCI y 86.3% para prevenir las muertes relacionadas al COVID-1918. Las diferencias observadas en los títulos de anticuerpos neutralizantes generados por ambas vacunas y la capacidad de estos anticuerpos para neutralizar las variantes de SARS-CoV-2 pueden ayudar a explicar las diferencias observadas especialmente en la efectividad para prevenir la enfermedad sintomática (97% para BNT162b2 *vs.* 65.9% para CoronaVac) en una configuración de vacunación de vida real que involucró a millones de individuos. Por lo tanto, nuestros datos proveen evidencia adicional que favorece el uso de los títulos de anticuerpos neutralizantes como un correlato de protección tal como ha sido sugerido recientemente4,5,19. El uso de un correlato de protección es particularmente importante cuando se analiza la posibilidad de incorporar esquemas de refuerzo en grupos específicos como los adultos mayores o individuos inmunosuprimidos.

Los datos presentados aquí también muestran por primera vez que el patrón único de mutaciones presentes en la espiga de la variante de interés emergente Lambda confiere escape a los anticuerpos neutralizantes generados por CoronaVac y en una menor medida por BNT162b2. Este efecto fue incluso mayor al observado para las VOC Alpha y Gamma en los sueros de vacunados con CoronaVac. Debido a que la deleción 246-252 en el NTD y las mutaciones L452Q/F490S en el RBD están ubicadas en sitios antigénicos, es probable que estas mutaciones reducen la afinidad a los anticuerpos neutralizantes generados por ambas vacunas. Nuestros datos también sugieren que las mutaciones en la proteína espiga de la variante Lambda confieren un incremento en la infectividad. En particular, los efectos potenciales de la mutación T859N merecen mayor investigación.

Nuestras observaciones contribuyen a explicar el rápido aumento de esta variante de interés en países de Sud América y servirán como una alarma para prevenir su expansión a otros continentes.

**REFERENCIAS**

1. Harvey, W.T.*, et al.* SARS-CoV-2 variants, spike mutations and immune escape. *Nat Rev Microbiol* **19**, 409-424 (2021).

2. WHO. COVID-19 Weekly Epidemiological Update Global overview. Availble at: <https://www.who.int/publications/m/item/weekly-epidemiological-update-on-covid-19---15-june-2021>

3. Romero, P.E.*, et al.* The Emergence of SARS-CoV-2 Variant Lambda (C.37) in South America. *medRxiv* (2021).

4. Khoury, D.S.*, et al.* Neutralizing antibody levels are highly predictive of immune protection from symptomatic SARS-CoV-2 infection. *Nat Med* **27**, 1205-1211 (2021).

5. Earle, K.A.*, et al.* Evidence for antibody as a protective correlate for COVID-19 vaccines. *Vaccine* **39**, 4423-4428 (2021).

6. Beltran-Pavez, C.*, et al.* Insights into neutralizing antibody responses in individuals exposed to SARS-CoV-2 in Chile. *Sci Adv* **7**(2021).

7. Liu, Z.*, et al.* Identification of SARS-CoV-2 spike mutations that attenuate monoclonal and serum antibody neutralization. *Cell Host Microbe* **29**, 477-488 e474 (2021).

8. Motozono, C.*, et al.* SARS-CoV-2 spike L452R variant evades cellular immunity and increases infectivity. *Cell Host Microbe* **29**, 1124-1136 e1111 (2021).

9. Weisblum, Y.*, et al.* Escape from neutralizing antibodies by SARS-CoV-2 spike protein variants. *Elife* **9**(2020).

10. McCallum, M.*, et al.* N-terminal domain antigenic mapping reveals a site of vulnerability for SARS-CoV-2. *Cell* **184**, 2332-2347 e2316 (2021).

11. Gonzalez-Puelma, J.*, et al.* Mutation in a SARS-CoV-2 Haplotype from Sub-Antarctic Chile Reveals New Insights into the Spike's Dynamics. *Viruses* **13**(2021).

12. Yurkovetskiy, L.*, et al.* Structural and Functional Analysis of the D614G SARS-CoV-2 Spike Protein Variant. *Cell* **183**, 739-751 e738 (2020).

13. Mansbach, R.A.*, et al.* The SARS-CoV-2 Spike variant D614G favors an open conformational state. *Sci Adv* **7**(2021).

14. Korber, B.*, et al.* Tracking Changes in SARS-CoV-2 Spike: Evidence that D614G Increases Infectivity of the COVID-19 Virus. *Cell* **182**, 812-827 e819 (2020).

15. Polack, F.P.*, et al.* Safety and Efficacy of the BNT162b2 mRNA Covid-19 Vaccine. *N Engl J Med* **383**, 2603-2615 (2020).

16. Liu, C.*, et al.* The Architecture of Inactivated SARS-CoV-2 with Postfusion Spikes Revealed by Cryo-EM and Cryo-ET. *Structure* **28**, 1218-1224 e1214 (2020).

17. Haas, E.J.*, et al.* Impact and effectiveness of mRNA BNT162b2 vaccine against SARS-CoV-2 infections and COVID-19 cases, hospitalisations, and deaths following a nationwide vaccination campaign in Israel: an observational study using national surveillance data. *Lancet* **397**, 1819-1829 (2021).

18. Jara, A.*, et al.* Effectiveness of an Inactivated SARS-CoV-2 Vaccine in Chile. *N Engl J Med* (2021).

19. Krammer, F. A correlate of protection for SARS-CoV-2 vaccines is urgently needed. *Nat Med* **27**, 1147-1148 (2021).
